# Supplementary material for: Oat β-glucan supplementation pre- and during pregnancy alleviates fetal intestinal immunity development damaged by gestational diabetes in rats
Source: Royal Society of Chemistry journal article supplement (doi:10.1039/d3fo00429e), 2023-01-01
Supplement: d3fo00429e1.pdf [file d3fo00429e1.pdf]

Supplementary Table 1 Formulas on two diets

|                     | CD (D12450B)<br>(gm%) | HFD (D12492)(gm%) |
|---------------------|-----------------------|-------------------|
| Casein              | 200                   | 200               |
| L-Cystine           | 3                     | 3                 |
| Corn Starch         | 0                     | 351               |
| Maltodextrin        | 125                   | 35                |
| Sucrose             | 68.8                  | 350               |
| Cellulose           | 50                    | 50                |
| Soybean Oil         | 25                    | 25                |
| Lard                | 245                   | 20                |
| Mineral Mix         | 10                    | 10                |
| DiCalcium Phosphate | 13                    | 13                |
| Calcium Carbonate   | 5.5                   | 5.5               |
| Potassium Citrate   | 16.5                  | 16.5              |
| Vitamin Mix         | 10                    | 10                |
| Choline Bitartrate  | 2                     | 2                 |
